# Supplementary material for: Unveiling Gut Microbiota and Metabolic Functions Contributed to Polyvinyl Chloride Degradation in Spodoptera frugiperda Larvae
Source: Research Square preprint supplement (doi:10.21203/rs.3.rs-4686713/v1), 2024-08-02
Supplement: Supplementary file 1 [file 691520d60efc65c958eb79d2.xlsx]

## Sheet: Dataset S1
Dataset S1 The sample name and location in four province of China
Sample collection Province	Sample ID	Sample type	Sample name	Sample collection location
YN	S20210220-4903_YN-IM1	Intestinal mocosa	YN-IM1	22°35′84″ N 101°51′47″ E
	S20210220-4904_YN-IM2	Intestinal mocosa	YN-IM2	22°35′84″ N 101°51′47″ E
	S20210220-4905_YN-IM3	Intestinal mocosa	YN-IM3	22°35′84″ N 101°51′47″ E
	S20210220-4906_YN-IM4	Intestinal mocosa	YN-IM4	22°35′84″ N 101°51′47″ E
	S20210220-4907_YN-IF1	Intestinal feces	YN-IF1	22°35′84″ N 101°51′47″ E
	S20210220-4908_YN-IF2	Intestinal feces	YN-IF2	22°35′84″ N 101°51′47″ E
	S20210220-4909_YN-IF3	Intestinal feces	YN-IF3	22°35′84″ N 101°51′47″ E
	S20210220-4910_YN-IF4	Intestinal feces	YN-IF4	22°35′84″ N 101°51′47″ E
	S20210220-4911_YN-EF1	Excreted feces	YN-EF1	22°35′84″ N 101°51′47″ E
	S20210220-4912_YN-EF2	Excreted feces	YN-EF2	22°35′84″ N 101°51′47″ E
	S20210220-4913_YN-EF3	Excreted feces	YN-EF3	22°35′84″ N 101°51′47″ E
	S20210220-4914_YN-EF4	Excreted feces	YN-EF4	22°35′84″ N 101°51′47″ E
	S20210220-4915_YN-CS1	Bulk soil	YN-BS1	22°40′49″ N 101°39′5″ E
	S20210220-4916_YN-CS2	Bulk soil	YN-BS2	22°41′6″ N 101°38′47″ E
	S20210220-4917_YN-CS3	Bulk soil	YN-BS3	22°40′30″ N 101°39′13″ E
	S20210220-4918_YN-CS4	Bulk soil	YN-BS4	24°26′19″ N 100°50′28″E
HN	S20210220-4919_HN-IM1	Intestinal mocosa	HN-IM1	30°8′25″ N 120°5′14″E
	S20210220-4920_HN-IM2	Intestinal mocosa	HN-IM2	30°8′25″ N 120°5′14″E
	S20210220-4921_HN-IM3	Intestinal mocosa	HN-IM3	30°8′25″ N 120°5′14″E
	S20210220-4922_HN-IM4	Intestinal mocosa	HN-IM4	30°8′25″ N 120°5′14″E
	S20210220-4923_HN-IF1	Intestinal feces	HN-IF1	30°8′25″ N 120°5′14″E
	S20210220-4924_HN-IF2	Intestinal feces	HN-IF2	30°8′25″ N 120°5′14″E
	S20210220-4925_HN-IF3	Intestinal feces	HN-IF3	30°8′25″ N 120°5′14″E
	S20210220-4926_HN-IF4	Intestinal feces	HN-IF4	30°8′25″ N 120°5′14″E
	S20210220-4927_HN-EF1	Excreted feces	HN-EF1	30°8′25″ N 120°5′14″E
	S20210220-4928_HN-EF2	Excreted feces	HN-EF2	30°8′25″ N 120°5′14″E
	S20210220-4929_HN-EF3	Excreted feces	HN-EF3	30°8′25″ N 120°5′14″E
	S20210220-4930_HN-EF4	Excreted feces	HN-EF4	30°8′25″ N 120°5′14″E
	S20210220-4931_HN-CS1	Bulk soil	HN-BS1	19°30′15″ N 109°28′7″ E
	S20210220-4932_HN-CS2	Bulk soil	HN-BS2	19°31′45″ N 109°27′17″ E
	S20210220-4933_HN-CS3	Bulk soil	HN-BS3	19°29′5″ N 109°26′23″ E
	S20210220-4934_HN-CS4	Bulk soil	HN-BS4	19°30′48″ N 109°30′24″ E
HEN	S20210220-4935_HEN-IM1	Intestinal mocosa	HEN-IM1	30°8′25″ N 120°5′14″E
	S20210220-4936_HEN-IM2	Intestinal mocosa	HEN-IM2	30°8′25″ N 120°5′14″E
	S20210220-4937_HEN-IM3	Intestinal mocosa	HEN-IM3	30°8′25″ N 120°5′14″E
	S20210220-4938_HEN-IM4	Intestinal mocosa	HEN-IM4	30°8′25″ N 120°5′14″E
	S20210220-4939_HEN-IF1	Intestinal feces	HEN-IF1	30°8′25″ N 120°5′14″E
	S20210220-4940_HEN-IF2	Intestinal feces	HEN-IF2	30°8′25″ N 120°5′14″E
	S20210220-4941_HEN-IF3	Intestinal feces	HEN-IF3	30°8′25″ N 120°5′14″E
	S20210220-4942_HEN-IF4	Intestinal feces	HEN-IF4	30°8′25″ N 120°5′14″E
	S20210220-4952_HEN-EF1	Excreted feces	HEN-EF1	30°8′25″ N 120°5′14″E
	S20210220-4953_HEN-EF2	Excreted feces	HEN-EF2	30°8′25″ N 120°5′14″E
	S20210220-4954_HEN-EF3	Excreted feces	HEN-EF3	30°8′25″ N 120°5′14″E
	S20210220-4955_HEN-EF4	Excreted feces	HEN-EF4	30°8′25″ N 120°5′14″E
	S20210220-4956_HEN-CS1	Bulk soil	HEN-BS1	35°0′34″ N 113°42′17″ E
	S20210220-4957_HEN-CS2	Bulk soil	HEN-BS2	33°45′5″ N 114°43′33″ E
	S20210220-4958_HEN-CS3	Bulk soil	HEN-BS3	34°6′3″ N 113°30′4″ E
	S20210220-4943_HEN-CS4	Bulk soil	HEN-BS4	32°6′12″ N 114°32′3″ E
HB	S20210220-4944_HB-IM1	Intestinal mocosa	HB-IM1	30°8′25″ N 120°5′14″E
	S20210220-4945_HB-IM2	Intestinal mocosa	HB-IM2	30°8′25″ N 120°5′14″E
	S20210220-4946_HB-IM3	Intestinal mocosa	HB-IM3	30°8′25″ N 120°5′14″E
	S20210220-4947_HB-IM4	Intestinal mocosa	HB-IM4	30°8′25″ N 120°5′14″E
	S20210220-4948_HB-IF1	Intestinal feces	HB-IF1	30°8′25″ N 120°5′14″E
	S20210220-4949_HB-IF2	Intestinal feces	HB-IF2	30°8′25″ N 120°5′14″E
	S20210220-4950_HB-IF3	Intestinal feces	HB-IF3	30°8′25″ N 120°5′14″E
	S20210220-4959_HB-IF4	Intestinal feces	HB-IF4	30°8′25″ N 120°5′14″E
	S20210220-4960_HB-EF1	Excreted feces	HB-EF1	30°8′25″ N 120°5′14″E
	S20210220-4961_HB-EF2	Excreted feces	HB-EF2	30°8′25″ N 120°5′14″E
	S20210220-4962_HB-EF3	Excreted feces	HB-EF3	30°8′25″ N 120°5′14″E
	S20210220-4963_HB-EF4	Excreted feces	HB-EF4	30°8′25″ N 120°5′14″E
	S20210220-4964_HB-CS1	Bulk soil	HB-BS1	30°24′43″ N 113°50′22″ E
	S20210220-4965_HB-CS2	Bulk soil	HB-BS2	30°24′33″ N 113°49′12″ E
	S20210220-4966_HB-CS3	Bulk soil	HB-BS3	30°23′40″ N 113°48′25″ E
	S20210220-4967_HB-CS4	Bulk soil	HB-BS4	30°24′23″ N 113°50′43″ E

## Sheet: Dataset S2
Dataset S2 The statistical results of ASV that contribute to enzyme EC: 1.11.1.19 and EC: 1.11.1.1 in the experiment of Tenebrio molitor lavae ingesting PVC
sample	function	taxon	taxon_abun	taxon_rel_abun	genome_function_count	taxon_function_abun	taxon_rel_function_abun
Bran_1	EC:1.11.1.19	ASV137	114	0.27	2	228	0.53
Bran_1	EC:1.11.1.19	ASV373	28	0.065	1	28	0.065
Bran_1	EC:1.11.1.19	ASV517	5.75	0.013	1	5.75	0.013
Bran_1	EC:1.11.1.19	ASV6	13060	30.55	1	13060	30.55
PVC_2	EC:1.11.1.1	ASV23	1450	3.67	1	1450	3.67
PVC_2	EC:1.11.1.1	ASV5	10659	26.97	1	10659	26.98
PVC_2	EC:1.11.1.1	ASV54	271	0.68	1	271	0.68
PVC_2	EC:1.11.1.1	ASV73	306	0.77	1	306	0.77
PVC_2	EC:1.11.1.1	ASV90	210	0.53	1	210	0.53

## Sheet: Dataset S3
Dataset S3 The statistical results of ASV that contribute to enzyme EC: 1.11.1.19 and EC: 1.11.1.1 in the experiment of Spodoptera frugiperda lavae ingesting PVC
sample	function	taxon	taxon_abun	taxon_rel_abun	genome_function_count	taxon_function_abun	taxon_rel_function_abun
PVC_IF1	EC:1.11.1.1	ASV14	102	0.49	1	102	0.49
PVC_IF1	EC:1.11.1.1	ASV2	5498.33	26.28	1	5498.33	26.28
PVC_IF1	EC:1.11.1.1	ASV24	90	0.43	1	90	0.43
PVC_IF1	EC:1.11.1.1	ASV4	2152.67	10.29	1	2152.67	10.29
PVC_IF1	EC:1.11.1.19	ASV18	133	0.64	1	133	0.64
PVC_IF1	EC:1.11.1.19	ASV26	12	0.06	1	12	0.06
PVC_IF1	EC:1.11.1.19	ASV30	69	0.33	1	69	0.33
PVC_IF1	EC:1.11.1.19	ASV33	17	0.08	1	17	0.08
PVC_IF1	EC:1.11.1.19	ASV42	44	0.21	1	44	0.21
PVC_IF1	EC:1.11.1.19	ASV45	27	0.13	1	27	0.13
PVC_IF1	EC:1.11.1.19	ASV47	71	0.34	1	71	0.34
PVC_IF1	EC:1.11.1.19	ASV57	5	0.02	1	5	0.02
PVC_IF1	EC:1.11.1.19	ASV66	8.67	0.04	1	8.67	0.04
PVC_IF1	EC:3.1.1.1	ASV2	5498.33	26.28	1	5498.33	26.28
PVC_IF1	EC:3.1.1.1	ASV21	5	0.02	1	5	0.02
PVC_IF1	EC:3.1.1.1	ASV24	90	0.43	1	90	0.43
PVC_IF1	EC:3.1.1.1	ASV30	69	0.33	1	69	0.33
PVC_IF1	EC:3.1.1.1	ASV4	2152.67	10.29	1	2152.67	10.29
PVC_IF1	EC:3.1.1.1	ASV45	27	0.13	1	27	0.13
PVC_IF1	EC:3.1.1.1	ASV62	40	0.19	1	40	0.19
PVC_IF1	EC:3.1.1.1	ASV66	8.67	0.04	1	8.67	0.04
PVC_IF1	EC:3.1.1.1	ASV71	6	0.03	1	6	0.03
PVC_IF1	EC:3.1.1.53	ASV11	1344	6.42	2	2688	12.85
PVC_IF1	EC:3.1.1.53	ASV17	95	0.45	5	475	2.27
PVC_IF1	EC:3.1.1.53	ASV21	5	0.02	1	5	0.02
PVC_IF1	EC:3.1.1.53	ASV22	131.5	0.63	1	131.5	0.63
PVC_IF1	EC:3.1.1.53	ASV36	62	0.3	5	310	1.48
PVC_IF1	EC:3.1.1.53	ASV37	135	0.65	2	270	1.29
PVC_IF1	EC:3.1.1.53	ASV49	4	0.02	5	20	0.1
PVC_IF1	EC:3.1.1.53	ASV52	16	0.08	3	48	0.23
PVC_IF1	EC:3.1.1.53	ASV67	7	0.03	1	7	0.03
PVC_IF1	EC:3.1.1.53	ASV68	43	0.21	1	43	0.21
PVC_IF1	EC:3.1.1.53	ASV75	8	0.04	5	40	0.19
PVC_IF1	EC:3.1.1.53	ASV95	36	0.17	2	72	0.34
PVC_IF1	EC:3.1.2.23	ASV22	131.5	0.63	1	131.5	0.63
PVC_IF1	EC:3.1.2.23	ASV32	29	0.14	1	29	0.14
PVC_IF1	EC:3.1.2.23	ASV51	12	0.06	1	12	0.06
PVC_IF1	EC:3.1.2.23	ASV68	43	0.21	1	43	0.21
PVC_IF1	EC:3.1.2.23	ASV7	2477	11.84	1	2477	11.84
